# Supplementary material for: Targeted Ablation of Primary Cilia in Differentiated Dopaminergic Neurons Reduces Striatal Dopamine and Responsiveness to Metabolic Stress
Source: MDPI journal article supplement (doi:10.3390/antiox10081284), 2021-08-13
Supplement: s1 [file s1]

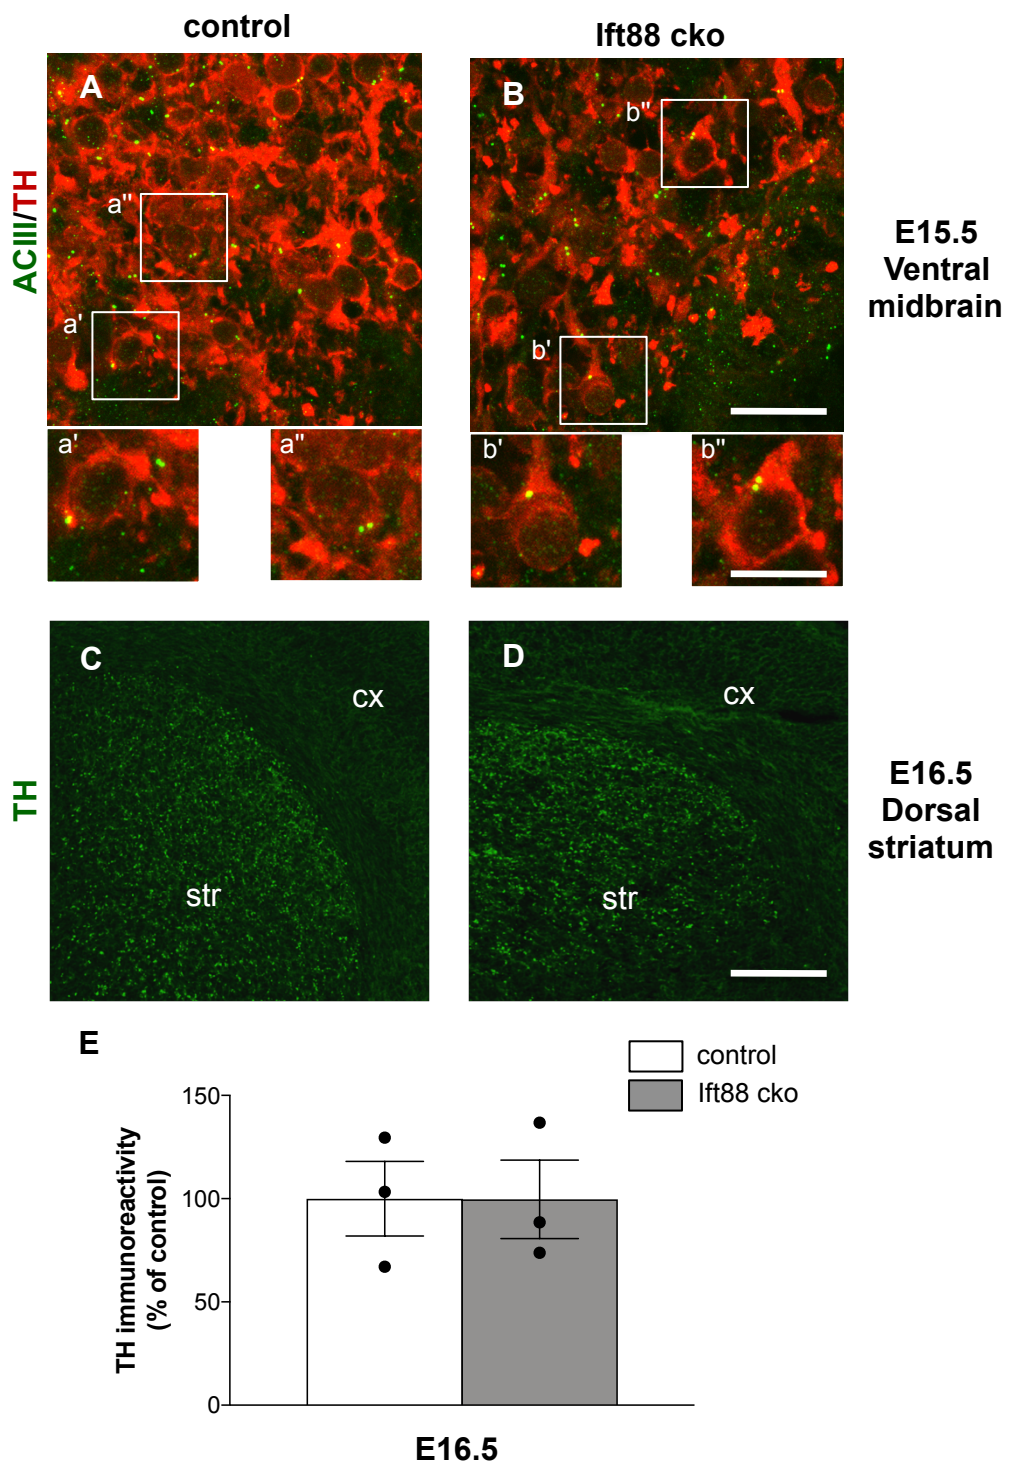

**Figure S1: Analysis of primary cilia in ventral midbrain dopaminergic neurons and of TH striatal immunoreactivity at embryonic stages.** (A,B) Representative confocal images of coronal midbrain sections at E15.5 by immunofluorescence with an ACIII-specific antibody (green) and a TH-specific antibody (red) in control and *lft88* cKO. Insets (a', a'', b', b'') show higher magnification of the boxed areas in panels A and B, respectively. (C,D) Representative confocal images of coronal striatal sections showing TH immunoreactivity (green) at E16.5 in control and *lft88* cKO. (E) Semi-quantitative analysis of TH immunoreactivity in the dorso-lateral striatum in control and *lft88* cKO mutant littermates at E16.5. The data are presented as the mean  $\pm$  SEM. No statistical significance between the indicated groups was determined by unpaired two-tailed Student's t test (for details see also Supplementary statistical information). Scale bars: A,B: 20  $\mu$ m, insets: 10  $\mu$ m, and C,D: 100  $\mu$ m. Abbreviations: str, striatum; cx, cortex.

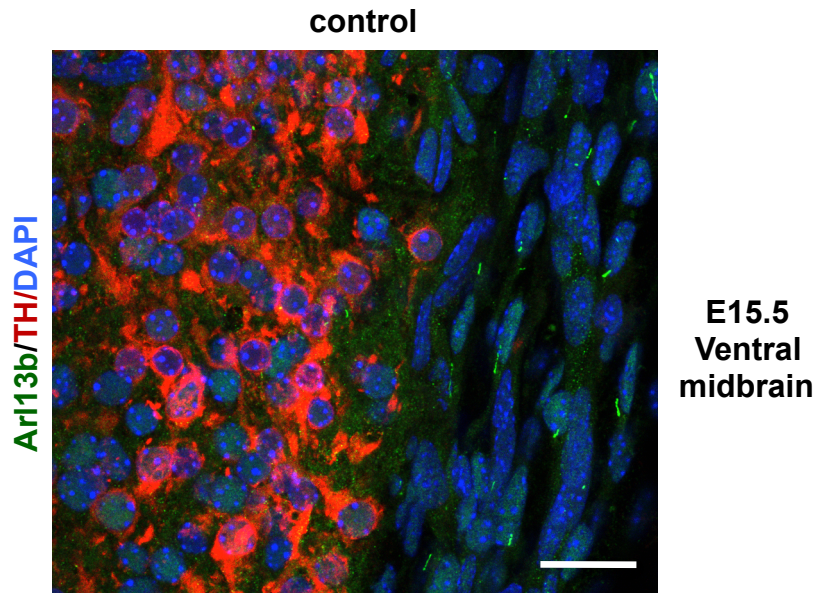

**Figure S2: Arl13b does not label primary cilia in TH immunostained neurons at E15.5.** Representative confocal image of coronal midbrain sections showing PC labeled by immunofluorescence with an Arl13b-specific antibody (green) in TH negative cells identified by nuclear DAPI staining (blue). A TH-specific antibody (red) is used to identify DA neurons in a E 15.5 control embryo. Scale bar: 20  $\mu$ m.

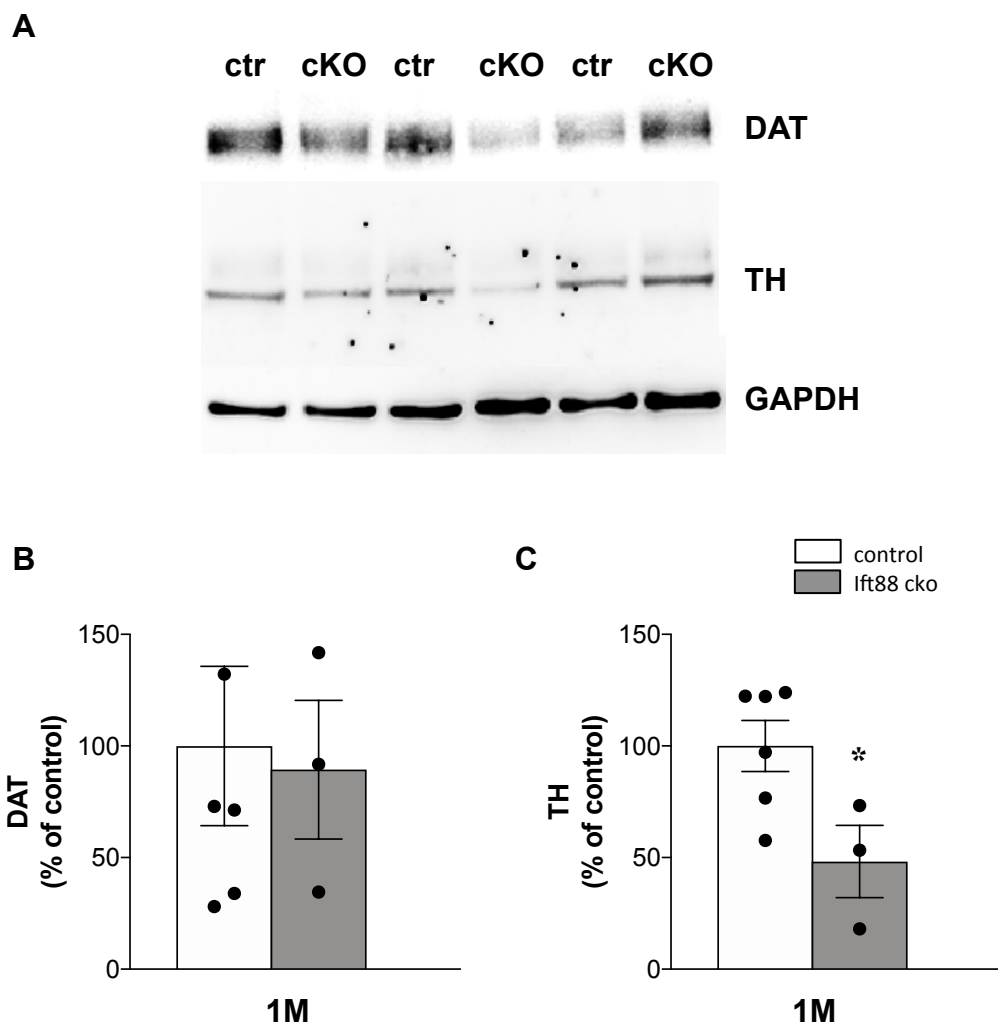

**Figure S3: Analysis of TH and DAT expression in dorsal striatum by Western blots.** (A) Western blot analysis of DAT, TH and GAPDH in dorsal striatum of control and *lft88* cKO mice. (B, C) Densitometric quantification of DAT and TH protein level expressed as percentage of controls. The data are presented as the mean  $\pm$  SEM. Statistical significance between the indicated groups was determined by unpaired two-tailed Student's t test (for details see also Supplementary statistical information). Abbreviations: ctr: control, M, month.

## Supplementary statistical information

### Suppl. Table S1

Data and statistics for graphs shown in **Fig. 1G**, n: total number of analysed TH positive neurons, N: number of mice. Statistical significance is shown according to two-way ANOVA.

| G) TH+ cells with the PC (%)        |       |      |      |        |               |        |
|-------------------------------------|-------|------|------|--------|---------------|--------|
|                                     | Mean  | ±SD  | ±SEM | Median | 95% CI        | n/N    |
| <b>E15.5 control</b>                | 91,97 | 3,75 | 2,16 | 92.04  | 82.66 – 101.3 | 663/3  |
| <b>E15.5 lft88<sup>DatCre</sup></b> | 83,92 | 5,49 | 3,17 | 84.48  | 70.29 – 97.56 | 720/3  |
| <b>E16.5 control</b>                | 91,38 | 3,10 | 1,79 | 90.65  | 83.67 – 99.09 | 728 /3 |
| <b>E16.5 lft88<sup>DatCre</sup></b> | 38,48 | 4,38 | 2,53 | 38.01  | 27.60 – 49.36 | 535/3  |
| <b>1 mo control</b>                 | 98,04 | 1,66 | 0,96 | 98.08  | 93.92 – 102.2 | 848/3  |
| <b>1 mo lft88<sup>DatCre</sup></b>  | 25,11 | 5,71 | 3,29 | 23.73  | 10.92 – 39.31 | 720/3  |
| <b>6 mo control</b>                 | 97,42 | 1,25 | 0,72 | 97.46  | 94.33 – 100.5 | 582/3  |
| <b>6 mo lft88<sup>DatCre</sup></b>  | 22,03 | 0,88 | 0,51 | 21.87  | 19.85 – 24.22 | 771/3  |

| *Two-way ANOVA      |         |
|---------------------|---------|
| Source of Variation | P value |
| Interaction         | <0.0001 |
| Age                 | <0.0001 |
| Genotype            | <0.0001 |

| Results of Fisher's LSD multiple comparison           | Summary | P value |
|-------------------------------------------------------|---------|---------|
| <b>E15.5 control vs. E15.5 lft88<sup>DatCre</sup></b> | *       | 0.0175  |
| <b>E15.5 control vs. E16.5 lft88<sup>DatCre</sup></b> | ****    | <0.0001 |
| <b>E15.5 control vs. 1 mo lft88<sup>DatCre</sup></b>  | ****    | <0.0001 |
| <b>E15.5 control vs. 6 mo lft88<sup>DatCre</sup></b>  | ****    | <0.0001 |
|                                                       |         |         |
| <b>E16.5 control vs. E15.5 lft88<sup>DatCre</sup></b> | *       | 0.0259  |
| <b>E16.5 control vs. E16.5 lft88<sup>DatCre</sup></b> | ****    | <0.0001 |
| <b>E16.5 control vs. 1mo lft88<sup>DatCre</sup></b>   | *       | 0.0434  |
| <b>E16.5 control vs. 6 mo lft88<sup>DatCre</sup></b>  | ****    | <0.0001 |
|                                                       |         |         |
| <b>1 mo control vs. E15.5 lft88<sup>DatCre</sup></b>  | ***     | 0.0003  |
| <b>1 mo control vs. E16.5 lft88<sup>DatCre</sup></b>  | ****    | <0.0001 |
| <b>1 mo control vs. 1 mo lft88<sup>DatCre</sup></b>   | ****    | <0.0001 |
| <b>1 mo control vs. 6 mo lft88<sup>DatCre</sup></b>   | ****    | <0.0001 |
|                                                       |         |         |
| <b>6 mo control vs. E15.5 lft88<sup>DatCre</sup></b>  | ***     | 0.0004  |
| <b>6 mo control vs. E16.5 lft88<sup>DatCre</sup></b>  | ****    | <0.0001 |
| <b>6 mo control vs. 1mo lft88<sup>DatCre</sup></b>    | ****    | <0.0001 |
| <b>6 mo control vs. 6 mo lft88<sup>DatCre</sup></b>   | ****    | <0.0001 |

**Suppl. Table S2**

Data and statistics for graphs shown in **Fig. 2C**, n: number of analysed striatal sections per mouse, N: number of mice. Statistical significance is shown according to two-tailed unpaired t-test.

| <b>2C) TH immunoreactivity (% of relative control)</b> |             |            |             |               |               |            |
|--------------------------------------------------------|-------------|------------|-------------|---------------|---------------|------------|
|                                                        | <b>Mean</b> | <b>±SD</b> | <b>±SEM</b> | <b>Median</b> | <b>95% CI</b> | <b>n/N</b> |
| <b>1 mo control</b>                                    | 100         | 15.57      | 8.99        | 106.9         | 61.33 – 138.7 | 7/3        |
| <b>1 mo lft88<sup>DatCre</sup></b>                     | 65.32       | 2.38       | 1.38        | 65.53         | 59.41 – 71.24 | 7/3        |
| <b>6 mo control</b>                                    | 100         | 8.86       | 5.12        | 98.70         | 77.98 – 122.0 | 7/3        |
| <b>6 mo lft88<sup>DatCre</sup></b>                     | 65.84       | 10.44      | 6.02        | 67.87         | 39.91 – 91.76 | 7/3        |

| <b>Two-tailed unpaired t-test</b>                   | <b>Summary</b> | <b>P value</b> |
|-----------------------------------------------------|----------------|----------------|
| <b>1 mo control vs. 1 mo lft88<sup>DatCre</sup></b> | *              | 0.019          |
| <b>6 mo control vs. 16mo lft88<sup>DatCre</sup></b> | *              | 0.012          |

Data and statistics for graphs shown in **Fig. 2F**, n: number of analysed striatal sections, N: number of mice. Statistical significance is shown according to two-tailed unpaired t-test.

| <b>2F) DAT immunoreactivity (% of relative control)</b> |             |            |             |               |               |            |
|---------------------------------------------------------|-------------|------------|-------------|---------------|---------------|------------|
|                                                         | <b>Mean</b> | <b>±SD</b> | <b>±SEM</b> | <b>Median</b> | <b>95% CI</b> | <b>n/N</b> |
| <b>1 mo control</b>                                     | 100         | 10.13      | 5.85        | 97.41         | 74.84 – 125.2 | 7/3        |
| <b>1 mo lft88<sup>DatCre</sup></b>                      | 68.96       | 15.97      | 9.22        | 73.43         | 29.30 – 108.6 | 7/3        |
| <b>6 mo control</b>                                     | 100         | 2.58       | 1.49        | 101.2         | 93.59 – 106.4 | 7/3        |
| <b>6 mo lft88<sup>DatCre</sup></b>                      | 82.72       | 8.90       | 5.14        | 77.6          | 60.62 – 104.8 | 7/3        |

| <b>Two-tailed unpaired t-test</b>                   | <b>Summary</b> | <b>P value</b> |
|-----------------------------------------------------|----------------|----------------|
| <b>1 mo control vs. 1 mo lft88<sup>DatCre</sup></b> | *              | 0.047          |
| <b>6 mo control vs. 6mo lft88<sup>DatCre</sup></b>  | *              | 0.032          |

### Suppl. Table S3

Data and statistics for graphs shown in **Fig. 2G**, N: number of mice. Statistical significance is shown according to two-tailed unpaired t-test.

| 2G) HPLC analysis of DA, DOPAC, HVA, 3MT, NA and 5HT<br>(pg/mg tissue) |                              |       |       |       |        |              |   |
|------------------------------------------------------------------------|------------------------------|-------|-------|-------|--------|--------------|---|
|                                                                        |                              | Mean  | ±SD   | ±SEM  | Median | 95% CI       | N |
| Dopamine                                                               | 6 mo control                 | 4137  | 615.0 | 205.0 | 4273   | 3664 – 4609  | 9 |
|                                                                        | 6 mo lft88 <sup>DatCre</sup> | 3310  | 218.9 | 97.89 | 3296   | 3038 - 3582  | 5 |
| DOPAC                                                                  | 6 mo control                 | 606.9 | 147.0 | 49.02 | 572.8  | 493.9 –719.9 | 9 |
|                                                                        | 6 mo lft88 <sup>DatCre</sup> | 486.1 | 62.4  | 27.91 | 461.5  | 408.6 –563.6 | 5 |
| HVA                                                                    | 6 mo control                 | 768.7 | 180.1 | 60.03 | 703.2  | 630.2 –907.1 | 9 |
|                                                                        | 6 mo lft88 <sup>DatCre</sup> | 671.7 | 114.6 | 51.24 | 718.9  | 529.4 –814.0 | 5 |
| 3MT                                                                    | 6 mo control                 | 456.1 | 80.7  | 26.9  | 470.7  | 394.1 –518.2 | 9 |
|                                                                        | 6 mo lft88 <sup>DatCre</sup> | 340.3 | 71.4  | 31.92 | 367.1  | 251.6 –428.9 | 5 |
| NA                                                                     | 6 mo control                 | 677.5 | 115.8 | 38.62 | 648.3  | 588.4 –766.5 | 9 |
|                                                                        | 6 mo lft88 <sup>DatCre</sup> | 620.2 | 83.2  | 37.22 | 564.1  | 516.8 –723.5 | 5 |
| 5HT                                                                    | 6 mo control                 | 437.4 | 193.7 | 64.58 | 437.4  | 288.5 –586.3 | 9 |
|                                                                        | 6 mo lft88 <sup>DatCre</sup> | 327.4 | 129.0 | 64.48 | 294.6  | 128.8 –460.4 | 5 |

| Two-tailed unpaired t-test                             | Summary | P value |
|--------------------------------------------------------|---------|---------|
| Dopamine 6 mo control vs. 6 mo lft88 <sup>DatCre</sup> | *       | 0.01    |
| DOPAC 6 mo control vs. 6mo lft88 <sup>DatCre</sup>     | ns      | 0.11    |
| HVA 6 mo control vs. 6mo lft88 <sup>DatCre</sup>       | ns      | 0.30    |
| 3MT 6 mo control vs. 6mo lft88 <sup>DatCre</sup>       | *       | 0.02    |
| NA 6 mo control vs. 6mo lft88 <sup>DatCre</sup>        | ns      | 0.35    |
| 5HT 6 mo control vs. 6mo lft88 <sup>DatCre</sup>       | ns      | 0.33    |

**Suppl. Table S4**

**Pacemaker activities and dopamine-responses of SN neurons from adult control and lft88 cKO mice.** MEA-recordings from **Fig. 3** in ACSF containing 25 mM glucose (upper), and 1 mM glucose (lower), as indicated. Pacemaker frequencies and pacemaker precision are given as mean basal firing rate and % coefficient of variance of the interspike interval (CV-ISI), respectively, during the first 10 minutes of recordings. “Activity at min 15 in dopamine [Hz]” was calculated as mean firing rate during the last minute of dopamine-application (100  $\mu$ M, 15 min). n represents the number of analyzed cells (in brackets, the relative % of this cell-type), N represents the number of analyzed mice. Data are given as mean  $\pm$  SEM. Datasets marked by (#) were not normally distributed. Significances/p-values according to unpaired Mann-Whitney tests, and Chi-square tests as indicated for comparison of relative abundances of dopamine-excited vs dopamine-inhibited SN neurons, and of the four different types of dopamine responses. P-values indicating significant differences are given in bold.

| <b>Dopamine responses (25 mM glucose)</b>           | <b>control mice</b>                  |                                      |                                                    |                               |          |
|-----------------------------------------------------|--------------------------------------|--------------------------------------|----------------------------------------------------|-------------------------------|----------|
|                                                     | <b>Basal firing rate [Hz]</b>        | <b>CV-ISI [%]</b>                    | <b>Activity at min 15 in dopamine [Hz]</b>         | <b>n (%)</b>                  | <b>N</b> |
| dopamine-excited, “silent”, no spontaneous activity | 0                                    | 11.3 $\pm$ 1.0                       | 8.5 $\pm$ 1.9                                      | 11 (13)                       | 3        |
| dopamine-excited, “active”, spontaneous activity    | 4.4 $\pm$ 0.7                        | 6.8 $\pm$ 0.9 <sup>#</sup>           | 11.9 $\pm$ 1.3                                     | 17 (20)                       | 3        |
| dopamine-inhibited, sensitized D2-AR                | 1.76 $\pm$ 0.2 <sup>#</sup>          | 15.1 $\pm$ 1.1                       | 0                                                  | 33 (39)                       | 3        |
| dopamine-inhibited, desensitized D2-AR              | 2.3 $\pm$ 0.2                        | 15.1 $\pm$ 1.4                       | 1.7 $\pm$ 0.2                                      | 24 (28)                       | 3        |
| <b>lft88 cKO mice</b>                               |                                      |                                      |                                                    |                               |          |
| dopamine-excited, “silent”, no spontaneous activity | 0                                    | 12.6 $\pm$ 1.1                       | 3.7 $\pm$ 0.4                                      | 15 (14)                       | 4        |
| dopamine-excited, “active”, spontaneous activity    | 2.9 $\pm$ 0.9                        | 6.0 $\pm$ 0.1                        | 12.1 $\pm$ 3.8                                     | 3 (3)                         | 4        |
| dopamine-inhibited, sensitized D2-AR                | 1.9 $\pm$ 0.1 <sup>#</sup>           | 14.8 $\pm$ 1.1 <sup>#</sup>          | 0                                                  | 47 (42)                       | 4        |
| dopamine-inhibited, desensitized D2-AR              | 2.1 $\pm$ 0.1                        | 15.2 $\pm$ 0.9 <sup>#</sup>          | 1.5 $\pm$ 0.2 <sup>#</sup>                         | 46 (41)                       | 4        |
| p-values (controls versus lft88 cKO)                | dopamine-silent: 0.4444<br>dopamine- | dopamine-silent: 0.5309<br>dopamine- | dopamine-silent: <b>0.0401</b><br>dopamine-active: | Chi-square: <b>p = 0.0062</b> |          |

|  |                                                                    |                                                                    |                                                              |                   |
|--|--------------------------------------------------------------------|--------------------------------------------------------------------|--------------------------------------------------------------|-------------------|
|  | active: 0.5456<br>dopamine-sens: 0.4777<br>dopamine-desens: 0.3857 | active: 0.8751<br>dopamine-sens: 0.7558<br>dopamine-desens: 0.9755 | >0.9999<br>dopamine-sens: >0.9999<br>dopamine-desens: 0.5683 | <b>p = 0.0001</b> |
|--|--------------------------------------------------------------------|--------------------------------------------------------------------|--------------------------------------------------------------|-------------------|

| Dopamine responses<br>(1 mM glucose)                          | control mice                                                                                                         |                                                                                                                     |                                                                                                                       |                                             |   |
|---------------------------------------------------------------|----------------------------------------------------------------------------------------------------------------------|---------------------------------------------------------------------------------------------------------------------|-----------------------------------------------------------------------------------------------------------------------|---------------------------------------------|---|
|                                                               | Basal firing rate<br>[Hz]                                                                                            | CV-ISI<br>[%]                                                                                                       | Activity at min<br>15<br>in DA [Hz]                                                                                   | n<br>(%)                                    | N |
| dopamine-excited,<br>“silent”,<br>no spontaneous<br>activity  | 0                                                                                                                    | 14.7 ± 3.7                                                                                                          | 7.6 ± 1.9                                                                                                             | 5<br>(7)                                    | 4 |
| dopamine -excited,<br>“active”,<br>spontaneous activity       | 6.7 ± 1.5 <sup>#</sup>                                                                                               | 6.1 ± 1.1                                                                                                           | 14.3 ± 2.4                                                                                                            | 11<br>(16)                                  | 4 |
| dopamine -inhibited,<br>sensitized D2-AR                      | 1.7 ± 0.1 <sup>#</sup>                                                                                               | 14.0 ± 1.1                                                                                                          | 0                                                                                                                     | 35<br>(51)                                  | 4 |
| dopamine -inhibited,<br>desensitized D2-AR                    | 1.6 ± 0.2                                                                                                            | 16.5 ± 1.4                                                                                                          | 0.89 ± 0.1                                                                                                            | 18<br>(26)                                  | 4 |
| lft88 cKO mice                                                |                                                                                                                      |                                                                                                                     |                                                                                                                       |                                             |   |
| dopamine -excited,<br>“silent”,<br>no spontaneous<br>activity | 0                                                                                                                    | 10.3 ± 1.4                                                                                                          | 7.1 ± 1.0                                                                                                             | 16<br>(12)                                  | 4 |
| dopamine -excited,<br>“active”,<br>spontaneous activity       | 3.7 ± 0.6                                                                                                            | 7.9 ± 0.9                                                                                                           | 10.1 ± 1.0 <sup>#</sup>                                                                                               | 13<br>(9)                                   | 4 |
| dopamine -inhibited,<br>sensitized D2-AR                      | 1.5 ± 0.08 <sup>#</sup>                                                                                              | 14.2 ± 0.8 <sup>#</sup>                                                                                             | 0                                                                                                                     | 76<br>(55)                                  | 4 |
| dopamine -inhibited,<br>desensitized D2-AR                    | 1.7 ± 0.1                                                                                                            | 14.1 ± 1.1                                                                                                          | 0.8 ± 0.1                                                                                                             | 34<br>(24)                                  | 4 |
| (controls versus lft88<br>cKO)                                | dopamine-silent:<br>>0.9999<br>dopamine-active:<br>0.0635<br>dopamine-sens:<br>0.0896<br>dopamine-<br>desens: 0.6681 | dopamine-silent:<br>0.3097<br>dopamine-<br>active: 0.192<br>dopamine-sens:<br>0.7307<br>dopamine-<br>desens: 0.2888 | dopamine-silent:<br>0.7241<br>dopamine-<br>active: 0.1623<br>dopamine-sens:<br>>0.9999<br>dopamine-<br>desens: 0.8229 | Chi-<br>square:<br>p = 0.7014<br>p = 0.4319 |   |

*Additional p-values/significances within groups assessed with Kruskal Wallis with Dunn's multiple comparison test.*

| Dopamine responses<br>(25 mM glucose) | control mice              |               |                                     |
|---------------------------------------|---------------------------|---------------|-------------------------------------|
|                                       | Basal firing rate<br>[Hz] | CV-ISI<br>[%] | Activity at min<br>15<br>in DA [Hz] |
| Desens vs sens                        | 0.5611                    | >0.9999       | <b>0.0002</b>                       |

|                       |                                   |                       |                                              |
|-----------------------|-----------------------------------|-----------------------|----------------------------------------------|
| Desens vs silent      | <b>&lt;0.0001</b>                 | 0.9274                | 0.0733                                       |
| Desens vs active      | <b>&gt;0.9999</b>                 | <b>0.0003</b>         | <b>0.0007</b>                                |
| Sens vs silent        | <b>0.0027</b>                     | 0.6691                | <b>&lt;0.0001</b>                            |
| Sens vs active        | <b>0.0307</b>                     | <b>&lt;0.0001</b>     | <b>&lt;0.0001</b>                            |
| Silent vs active      | <b>&lt;0.0001</b>                 | 0.2539                | <b>&gt;0.9999</b>                            |
| <b>lft88 cKO mice</b> |                                   |                       |                                              |
|                       | <b>Basal firing rate<br/>[Hz]</b> | <b>CV-ISI<br/>[%]</b> | <b>Activity at min<br/>15<br/>in DA [Hz]</b> |
| Desens vs sens        | <b>&gt;0.9999</b>                 | <b>&gt;0.9999</b>     | <b>&lt;0.0001</b>                            |
| Desens vs silent      | <b>&lt;0.0001</b>                 | 0.5592                | <b>0.0564</b>                                |
| Desens vs active      | <b>&gt;0.9999</b>                 | <b>0.0054</b>         | 0.2278                                       |
| Sens vs silent        | <b>&lt;0.0001</b>                 | 0.4188                | <b>&lt;0.0001</b>                            |
| Sens vs active        | 0.9841                            | <b>0.0013</b>         | <b>&lt;0.0001</b>                            |
| Silent vs active      | <b>0.0014</b>                     | <b>&gt;0.9999</b>     | <b>&gt;0.9999</b>                            |

|                                              |                                   |                       |                                              |
|----------------------------------------------|-----------------------------------|-----------------------|----------------------------------------------|
| <b>Dopamine responses<br/>(1 mM glucose)</b> | <b>control mice</b>               |                       |                                              |
|                                              | <b>Basal firing rate<br/>[Hz]</b> | <b>CV-ISI<br/>[%]</b> | <b>Activity at min<br/>15<br/>in DA [Hz]</b> |
| Desens vs sens                               | <b>&gt;0.9999</b>                 | <b>&gt;0.9999</b>     | <b>&lt;0.0001</b>                            |
| Desens vs silent                             | 0.6070                            | <b>&gt;0.9999</b>     | 0.7797                                       |
| Desens vs active                             | <b>0.0007</b>                     | <b>0.0002</b>         | <b>0.0353</b>                                |
| Sens vs silent                               | <b>0.0266</b>                     | <b>&gt;0.9999</b>     | <b>&lt;0.0001</b>                            |
| Sens vs active                               | <b>0.0003</b>                     | <b>0.0030</b>         | <b>&lt;0.0001</b>                            |
| Silent vs active                             | <b>&lt;0.0001</b>                 | 0.1176                | <b>&gt;0.9999</b>                            |
| <b>lft88 cKO mice</b>                        |                                   |                       |                                              |
|                                              | <b>Basal firing rate<br/>[Hz]</b> | <b>CV-ISI<br/>[%]</b> | <b>Activity at min<br/>15<br/>in DA [Hz]</b> |
| Desens vs sens                               | 0.8157                            | <b>&gt;0.9999</b>     | <b>&lt;0.0001</b>                            |
| Desens vs silent                             | <b>&lt;0.0001</b>                 | 0.5592                | 0.1420                                       |
| Desens vs active                             | 0.2677                            | <b>0.0054</b>         | <b>0.0125</b>                                |
| Sens vs silent                               | <b>&lt;0.0001</b>                 | 0.4188                | <b>&lt;0.0001</b>                            |
| Sens vs active                               | <b>0.0052</b>                     | <b>0.0013</b>         | <b>&lt;0.0001</b>                            |
| Silent vs active                             | <b>&lt;0.0001</b>                 | <b>&gt;0.9999</b>     | <b>&gt;0.9999</b>                            |

**Suppl. Table S5**

Data and statistics for graphs shown in **Fig. 4B**, n: total number of analysed striatal sections, N: number of mice. Statistical significance is shown according to two-way ANOVA.

| <b>4B) TH immunoreactivity (% of control w/o MPTP)</b> |             |            |             |               |               |            |
|--------------------------------------------------------|-------------|------------|-------------|---------------|---------------|------------|
|                                                        | <b>Mean</b> | <b>±SD</b> | <b>±SEM</b> | <b>Median</b> | <b>95% CI</b> | <b>n/N</b> |
| <b>Control w/o MPTP</b>                                | 100         | 24,79      | 9,37        | 105.3         | 77.08 – 122.9 | 7/7        |
| <b>Control w/ MPTP</b>                                 | 55,41       | 12,50      | 6,24        | 56.18         | 35.55 – 75.26 | 7/4        |
| <b>Mutant w/o MPTP</b>                                 | 74,24       | 13,11      | 4,95        | 69.61         | 62.12 – 86.37 | 7/7        |
| <b>Mutant w/ MPTP</b>                                  | 67,20       | 13,50      | 6,75        | 69.88         | 45.71 – 88.65 | 7/4        |

| <b>*Two-way ANOVA</b>      |                |
|----------------------------|----------------|
| <b>Source of Variation</b> | <b>P value</b> |
| <b>Interaction</b>         | 0.029          |
| <b>Treatment</b>           | 0.0043         |
| <b>Genotype</b>            | 0.388          |

| <b>Results of Fisher's LSD multiple comparison</b> | <b>Summary</b> | <b>p value</b> |
|----------------------------------------------------|----------------|----------------|
| <b>Control w/o MPTP vs. Control w/ MPTP</b>        | ***            | 0.001          |
| <b>Control w/o MPTP vs. Mutant w/o MPTP</b>        | *              | 0.015          |
| <b>Control w/o MPTP vs. Mutant w/ MPTP</b>         | **             | 0.009          |
| <b>Mutant w/o MPTP vs. Control w/ MPTP</b>         | ns             | 0.110          |
| <b>Mutant w/o MPTP vs. Mutant w/ MPTP</b>          | ns             | 0.535          |
| <b>Control w/ MPTP vs. Mutant w/ MPTP</b>          | ns             | 0.363          |

**Suppl. Table S6**

Data and statistics for graphs shown in **Fig. 4D (upper panel)**, N: number of mice. Statistical significance is shown according to two-way ANOVA.

| <b>4D) Number of TH positive neurons in SN (% of control w/o MPTP)</b> |                             |             |            |             |               |                  |          |
|------------------------------------------------------------------------|-----------------------------|-------------|------------|-------------|---------------|------------------|----------|
|                                                                        | <b>Raw numbers<br/>±SEM</b> | <b>Mean</b> | <b>±SD</b> | <b>±SEM</b> | <b>Median</b> | <b>95% CI</b>    | <b>N</b> |
| <b>Control w/o MPTP</b>                                                | 13292,98<br>±1443,83        | 100         | 24.29      | 10.86       | 96.61         | 69.85 –<br>130.2 | 5        |
| <b>Control w/ MPTP</b>                                                 | 7553,68<br>±607,4           | 56.82       | 10.22      | 4.57        | 57.74         | 44.14 –<br>69.51 | 5        |
| <b>Mutant w/o MPTP</b>                                                 | 10132,25<br>±370,08         | 76.22       | 6.23       | 2.79        | 74.22         | 68.50 –<br>83.95 | 5        |
| <b>Mutant w/ MPTP</b>                                                  | 9922,19<br>±548,25          | 74.64       | 9.22       | 4.12        | 74.33         | 63.19 –<br>86.09 | 5        |

| <b>*Two-way ANOVA</b>      |                |
|----------------------------|----------------|
| <b>Source of Variation</b> | <b>P value</b> |
| <b>Interaction</b>         | 0.005          |
| <b>Treatment</b>           | 0.65           |
| <b>Genotype</b>            | 0.003          |

| <b>Results of Fisher's LSD multiple comparison</b> | <b>Summary</b> | <b>p value</b> |
|----------------------------------------------------|----------------|----------------|
| <b>Control w/o MPTP vs. Control w/ MPTP</b>        | *              | 0.018          |
| <b>Control w/o MPTP vs. Mutant w/o MPTP</b>        | ***            | 0.0002         |
| <b>Control w/o MPTP vs. Mutant w/ MPTP</b>         | *              | 0.013          |
| <b>Mutant w/o MPTP vs. Control w/ MPTP</b>         | *              | 0.048          |
| <b>Mutant w/o MPTP vs. Mutant w/ MPTP</b>          | ns             | 0.067          |
| <b>Control w/ MPTP vs. Mutant w/ MPTP</b>          | ns             | 0.862          |

**Suppl. Table S7**

Data and statistics for graphs shown in **Fig. 4D (lower panel)**, N: number of mice. Statistical significance is shown according to two-way ANOVA.

| <b>4D) Number of TH positive neurons in VTA (% of control w/o MPTP)</b> |                             |             |            |             |               |               |          |
|-------------------------------------------------------------------------|-----------------------------|-------------|------------|-------------|---------------|---------------|----------|
|                                                                         | <b>Raw numbers<br/>±SEM</b> | <b>Mean</b> | <b>±SD</b> | <b>±SEM</b> | <b>Median</b> | <b>95% CI</b> | <b>N</b> |
| <b>Control w/o MPTP</b>                                                 | <b>16316.28<br/>±1726.9</b> | 100         | 23.67      | 10.6        | 89.36         | 70.61 – 129.4 | 5        |
| <b>Control w/ MPTP</b>                                                  | <b>9082.73<br/>±1150.4</b>  | 55.67       | 15.77      | 7.1         | 56.12         | 36.09 – 75.24 | 5        |
| <b>Mutant w/o MPTP</b>                                                  | <b>12648.85<br/>±539.1</b>  | 77.52       | 7.9        | 3.3         | 76.77         | 68.35 – 86.69 | 5        |
| <b>Mutant w/ MPTP</b>                                                   | <b>13929.94<br/>±1240.1</b> | 85.37       | 16.99      | 7.6         | 80.99         | 64.27 – 106.5 | 5        |

| <b>*Two-way ANOVA</b>      |                |
|----------------------------|----------------|
| <b>Source of Variation</b> | <b>P value</b> |
| <b>Interaction</b>         | 0.003          |
| <b>Treatment</b>           | 0.029          |
| <b>Genotype</b>            | 0.641          |

| <b>Results of Fisher's LSD multiple comparison</b> | <b>Summary</b> | <b>P value</b> |
|----------------------------------------------------|----------------|----------------|
| <b>Control w/o MPTP vs. Control w/ MPTP</b>        | ***            | 0.001          |
| <b>Control w/o MPTP vs. Mutant w/o MPTP</b>        | ns             | 0.052          |
| <b>Control w/o MPTP vs. Mutant w/ MPTP</b>         | ns             | 0.192          |
| <b>Mutant w/o MPTP vs. Control w/ MPTP</b>         | ns             | 0.059          |
| <b>Mutant w/o MPTP vs. Mutant w/ MPTP</b>          | ns             | 0.475          |
| <b>Control w/ MPTP vs. Mutant w/ MPTP</b>          | *              | 0.014          |

**Suppl. Table S8**

Data and statistics for graphs shown in **Fig. 5C,F**, n: total number of analysed NeuN positive striatal neurons, N: number of mice. Statistical significance is shown according to two-tailed unpaired t-test.

| <b>5C) Average PC length (µm)</b>  |             |            |             |               |               |            |
|------------------------------------|-------------|------------|-------------|---------------|---------------|------------|
|                                    | <b>Mean</b> | <b>±SD</b> | <b>±SEM</b> | <b>Median</b> | <b>95% CI</b> | <b>n/N</b> |
| <b>1 mo control</b>                | 4.85        | 0.33       | 0.19        | 4.686         | 4.02 – 5.68   | 240/3      |
| <b>1 mo lft88<sup>DatCre</sup></b> | 8.54        | 0.16       | 0.09        | 8.533         | 8.14 – 8.93   | 240/3      |

| <b>Two-tailed unpaired t-test</b>         | <b>Summary</b> | <b>P value</b> |
|-------------------------------------------|----------------|----------------|
| <b>control vs. lft88<sup>DatCre</sup></b> | ****           | <0.0001        |

| <b>5F) mean PC length (µm)</b> |             |            |             |               |               |            |
|--------------------------------|-------------|------------|-------------|---------------|---------------|------------|
|                                | <b>Mean</b> | <b>±SD</b> | <b>±SEM</b> | <b>Median</b> | <b>95% CI</b> | <b>n/N</b> |
| <b>6 mo control w/o MPTP</b>   | 6.29        | 0.04       | 0.02        | 6.271         | 6.20 – 6.38   | 240/3      |
| <b>6 mo control w/ MPTP</b>    | 10.9        | 0.25       | 0.14        | 10.84         | 10.28 – 11.52 | 240/3      |

| <b>Two-tailed unpaired t-test</b>                | <b>Summary</b> | <b>P value</b> |
|--------------------------------------------------|----------------|----------------|
| <b>6 mo control w/o MPTP vs. control w/ MPTP</b> | ****           | <0.0001        |

**Suppl. Table S9**

Data and statistics for graphs shown in **Fig. 5K, L**, n: total number of analysed TH positive neurons in SN, N: number of mice. Statistical significance is shown according to two-tailed unpaired t-test.

| <b>5K) mean PC length (µm)</b> |             |            |             |               |               |            |
|--------------------------------|-------------|------------|-------------|---------------|---------------|------------|
|                                | <b>Mean</b> | <b>±SD</b> | <b>±SEM</b> | <b>Median</b> | <b>95% CI</b> | <b>n/N</b> |
| <b>6 mo control w/o MPTP</b>   | 5.27        | 0.18       | 0.10        | 5.242         | 4.82 – 5.72   | 240/3      |
| <b>6 mo control w/ MPTP</b>    | 5.43        | 0.86       | 0.5         | 4.958         | 3.29 – 7.58   | 240/3      |

| <b>Two-tailed unpaired t-test</b>           | <b>Summary</b> | <b>P value</b> |
|---------------------------------------------|----------------|----------------|
| <b>control w/o MPTP vs. control w/ MPTP</b> | ns             | 0.76           |

| <b>5L) mean PC length (µm)</b> |             |            |             |               |               |            |
|--------------------------------|-------------|------------|-------------|---------------|---------------|------------|
|                                | <b>Mean</b> | <b>±SD</b> | <b>±SEM</b> | <b>Median</b> | <b>95% CI</b> | <b>n/N</b> |
| <b>6 mo control w/o MPTP</b>   | 5.13        | 0.4        | 0.2         | 4.991         | 4.15 – 6.19   | 240/3      |
| <b>6 mo control w/ MPTP</b>    | 5.77        | 0.7        | 0.4         | 5.596         | 4.07 – 7.45   | 240/3      |

| <b>Two-tailed unpaired t-test</b>           | <b>Summary</b> | <b>P value</b> |
|---------------------------------------------|----------------|----------------|
| <b>control w/o MPTP vs. control w/ MPTP</b> | ns             | 0.23           |

**Suppl. Table S10**

Data and statistics for graphs shown in **Fig. 6C**, n: total number of analysed NeuN positive neurons in the striatum, N: number of mice. Statistical significance is shown according to two-tailed unpaired t-test.

| <b>6C) mean PC length (µm)</b> |             |            |             |               |               |            |
|--------------------------------|-------------|------------|-------------|---------------|---------------|------------|
|                                | <b>Mean</b> | <b>±SD</b> | <b>±SEM</b> | <b>Median</b> | <b>95% CI</b> | <b>n/N</b> |
| <b>1 mo control</b>            | 4.85        | 0.33       | 0.19        | 4.686         | 4.02 – 5.68   | 240/3      |
| <b>12 mo control</b>           | 7.39        | 0.13       | 0.07        | 7.359         | 7.07 – 7.70   | 240/3      |

| <b>Two-tailed unpaired t-test</b>         | <b>Summary</b> | <b>P value</b> |
|-------------------------------------------|----------------|----------------|
| <b>control vs. lft88<sup>DatCre</sup></b> | ***            | 0.0002         |

**Suppl. Table S11**

Data and statistics for graphs shown in **Fig. 6F**, n: total number of analysed TH positive neurons in SN and VTA, N: number of mice. Statistical significance is shown according to two-tailed unpaired t-test.

| <b>6F) mean PC length (µm) SN</b> |             |            |             |               |               |            |
|-----------------------------------|-------------|------------|-------------|---------------|---------------|------------|
|                                   | <b>Mean</b> | <b>±SD</b> | <b>±SEM</b> | <b>Median</b> | <b>95% CI</b> | <b>n/N</b> |
| <b>1 mo control</b>               | 5.94        | 0.57       | 0.33        | 5.679         | 4.53 – 7.35   | 240/3      |
| <b>12 mo control</b>              | 4.42        | 0.99       | 0.57        | 4.098         | 1.95 – 6.88   | 240/3      |

| <b>Two-tailed unpaired t-test</b>         | <b>Summary</b> | <b>p value</b> |
|-------------------------------------------|----------------|----------------|
| <b>control vs. lft88<sup>DatCre</sup></b> | n.s.           | <b>0.08</b>    |

| <b>6I) mean PC length (µm) VTA</b> |             |            |             |               |               |            |
|------------------------------------|-------------|------------|-------------|---------------|---------------|------------|
|                                    | <b>Mean</b> | <b>±SD</b> | <b>±SEM</b> | <b>Median</b> | <b>95% CI</b> | <b>n/N</b> |
| <b>1 mo control</b>                | 6.08        | 0.67       | 0.39        | 5.993         | 4.41 – 7.75   | 240/3      |
| <b>12 mo control</b>               | 3.95        | 0.91       | 0.53        | 4.073         | 1.68 – 6.21   | 240/3      |

| <b>Two-tailed unpaired t-test</b>         | <b>Summary</b> | <b>P value</b> |
|-------------------------------------------|----------------|----------------|
| <b>control vs. lft88<sup>DatCre</sup></b> | *              | <b>0.03</b>    |

**Suppl. Table S12**

Data and statistics for graphs shown in **Suppl. Fig. 1**, n: total number of analysed positive striatal sections, N: number of mice. Statistical significance is shown according to two-tailed unpaired t-test.

| <b>TH immunoreactivity (% of control)</b> |             |            |             |               |               |            |
|-------------------------------------------|-------------|------------|-------------|---------------|---------------|------------|
|                                           | <b>Mean</b> | <b>±SD</b> | <b>±SEM</b> | <b>Median</b> | <b>95% CI</b> | <b>n/N</b> |
| <b>E16.5 control</b>                      | 100         | 31.35      | 18.1        | 103.4         | 22.12 – 177.9 | 7/3        |
| <b>E16.5 lft88<sup>DatCre</sup></b>       | 99.7        | 32.93      | 19.0        | 88.52         | 17.89 – 181.5 | 7/3        |

| <b>Two-tailed unpaired t-test</b>         | <b>Summary</b> | <b>P value</b> |
|-------------------------------------------|----------------|----------------|
| <b>control vs. lft88<sup>DatCre</sup></b> | n.s.           | <b>0.99</b>    |

**Suppl. Table S13**

Data and statistics for graphs shown in **Suppl. Fig. 3**, N: number of mice. Statistical significance is shown according to two-tailed unpaired t-test.

| <b>DAT densitometric analysis (a.u.) (% of control)</b> |             |            |             |               |                |          |
|---------------------------------------------------------|-------------|------------|-------------|---------------|----------------|----------|
|                                                         | <b>Mean</b> | <b>±SD</b> | <b>±SEM</b> | <b>Median</b> | <b>95% CI</b>  | <b>N</b> |
| <b>control</b>                                          | 100         | 87.5       | 35.7        | 72.11         | 8.21 – 191.8   | 6        |
| <b>lft88<sup>DatCre</sup></b>                           | 89.4        | 53.7       | 31.0        | 91.75         | -44.04 – 222.8 | 3        |

| <b>Two-tailed unpaired t-test</b>         | <b>Summary</b> | <b>P value</b> |
|-------------------------------------------|----------------|----------------|
| <b>control vs. lft88<sup>DatCre</sup></b> | n.s            | 0.855          |

| <b>TH densitometric analysis (a.u.) (% of control)</b> |             |            |             |               |                |          |
|--------------------------------------------------------|-------------|------------|-------------|---------------|----------------|----------|
|                                                        | <b>Mean</b> | <b>±SD</b> | <b>±SEM</b> | <b>Median</b> | <b>95% CI</b>  | <b>N</b> |
| <b>control</b>                                         | 100         | 27.9       | 11.4        | 109.7         | 70.69 - 129.3  | 6        |
| <b>lft88<sup>DatCre</sup></b>                          | 48.2        | 28         | 16.2        | 53.36         | -21.23 – 117.8 | 3        |

| <b>Two-tailed unpaired t-test</b>         | <b>Summary</b> | <b>P value</b> |
|-------------------------------------------|----------------|----------------|
| <b>control vs. lft88<sup>DatCre</sup></b> | *              | 0.034          |
